# Supplementary material
Source: PubMed Central journal article supplement (PMC2043016)
Supplement: pbio.0050244.sg001.pdf [file pbio.0050244.sg001.pdf]

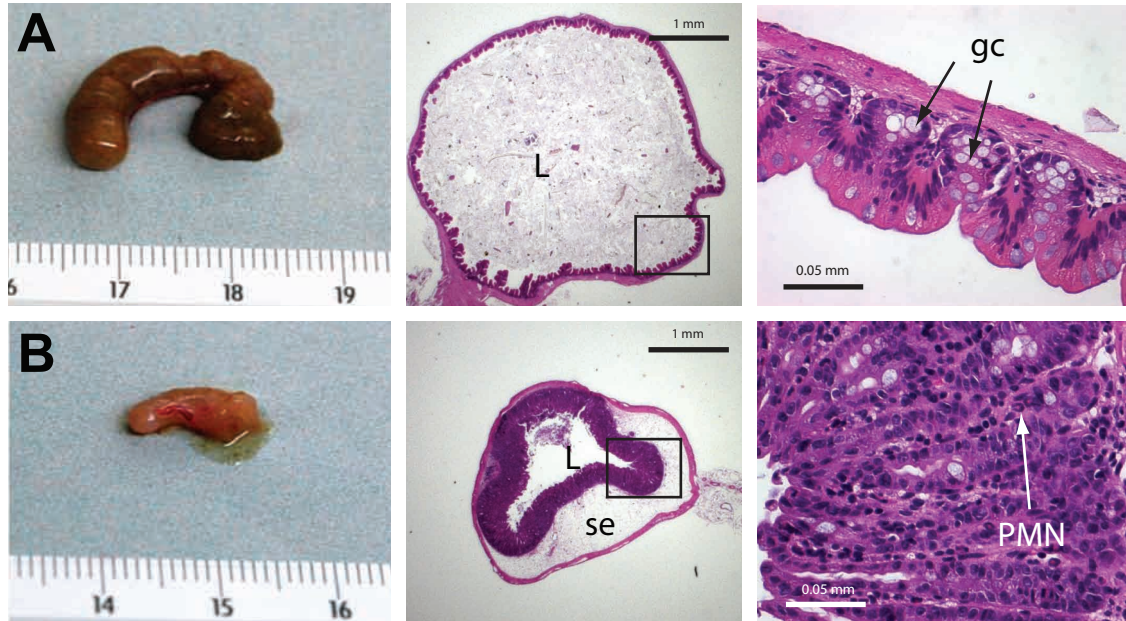

### Colitis Score

| <b>Parameter</b>                                     | <b>0</b>   | <b>1</b>                  | <b>2</b>                     | <b>3</b>                       | <b>4</b> |
|------------------------------------------------------|------------|---------------------------|------------------------------|--------------------------------|----------|
| submucosal edema (se)                                | no changes | detectable edema (se<10%) | moderate edema (se=10-40%)   | profound edema (se>40%)        |          |
| PMN infiltration per 400 x high power field          | 0-5        | 6-20                      | 21-60                        | 61-100                         | > 100    |
| Loss of goblet cells (gc) per 400 x high power field | > 28       | 11-28                     | 1-10                         | < 1                            |          |
| Epithelium                                           | no changes | desquamation              | Erosion (gaps of 1-10 cells) | Ulceration (gaps of >10 cells) |          |
