# Supplementary material
Source: PubMed Central journal article supplement (PMC2043016)

*S. Tm*-induced colitis

*S. Tm*<sup>wt</sup>  
C57BL/6  
day 4 p.i.

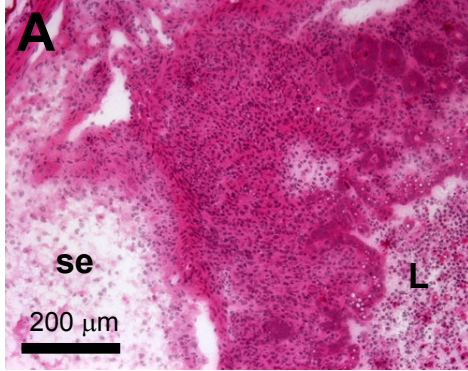

*S. Tm*<sup>avir</sup>  
C57BL/6  
day 4 p.i.

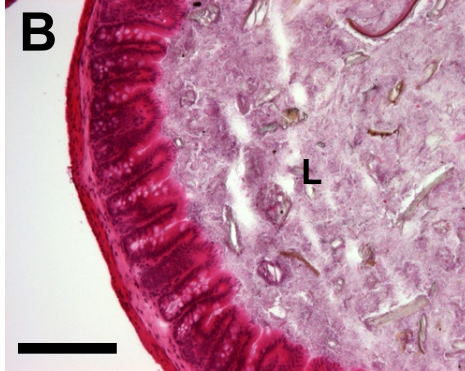

*S. Tm*<sup>wt</sup>  
129Sv/Ev  
day 47 p.i.

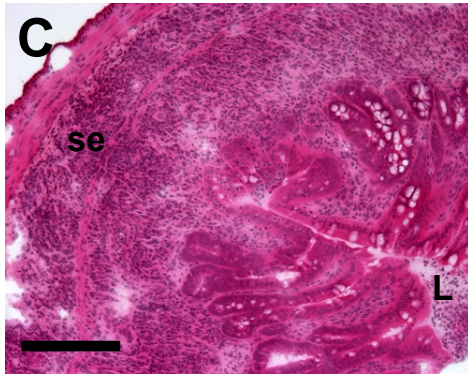

*S. Tm*<sup>avir</sup>  
129Sv/Ev  
day 47 p.i.

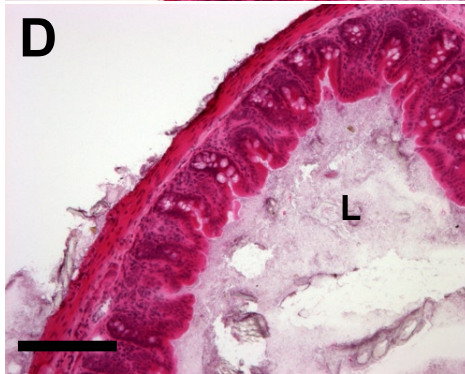

Colitis in IL10<sup>-/-</sup> mouse models

*S. Tm*<sup>avir</sup>  
C57BL/6<sup>IL10<sup>-/-</sup></sup>  
day 2 p.i.

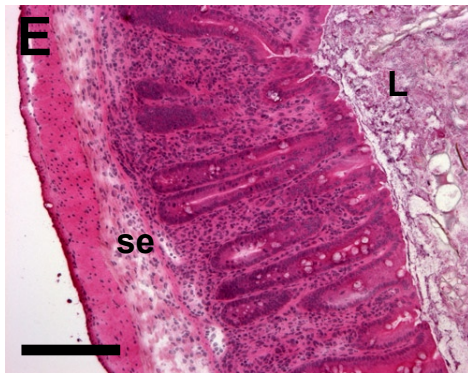

*S. Tm*<sup>avir</sup>  
C57BL/6<sup>IL10<sup>-/-</sup></sup>  
day 2 p.i.

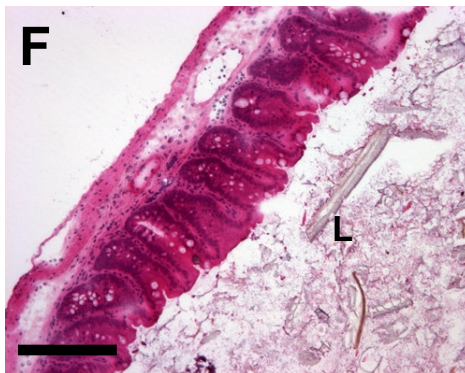

*S. Tm*<sup>avir</sup>  
C3H/HeBir<sup>IL10<sup>-/-</sup></sup>  
day 2 p.i.

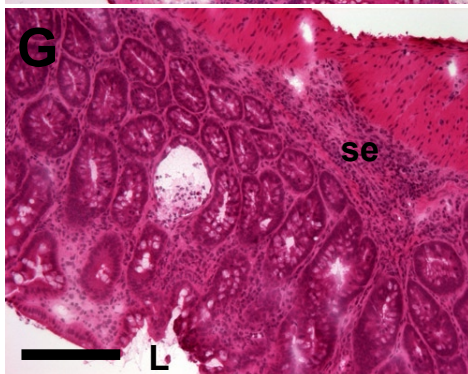

*S. Tm*<sup>avir</sup>  
C3H/HeBir<sup>IL10<sup>-/-</sup></sup>  
day 2 p.i.

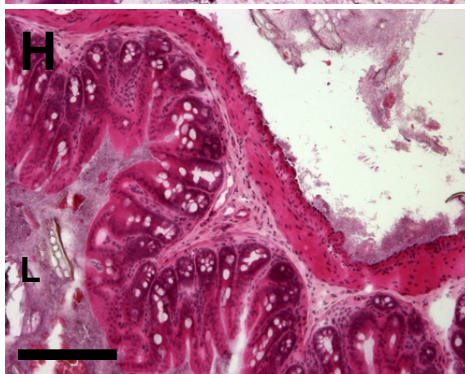

Supplement: pbio.0050244.sg003.pdf [file pbio.0050244.sg003.pdf]
