# Supplementary material
Source: PubMed Central journal article supplement (PMC2043016)

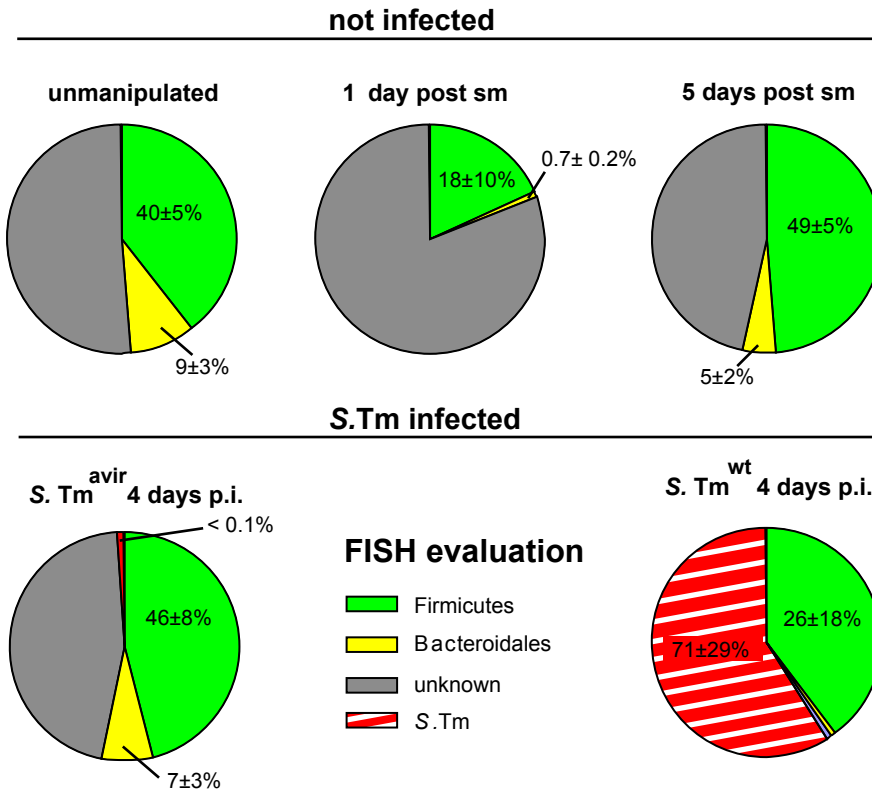

Supplement: pbio.0050244.sg002.pdf [file pbio.0050244.sg002.pdf]

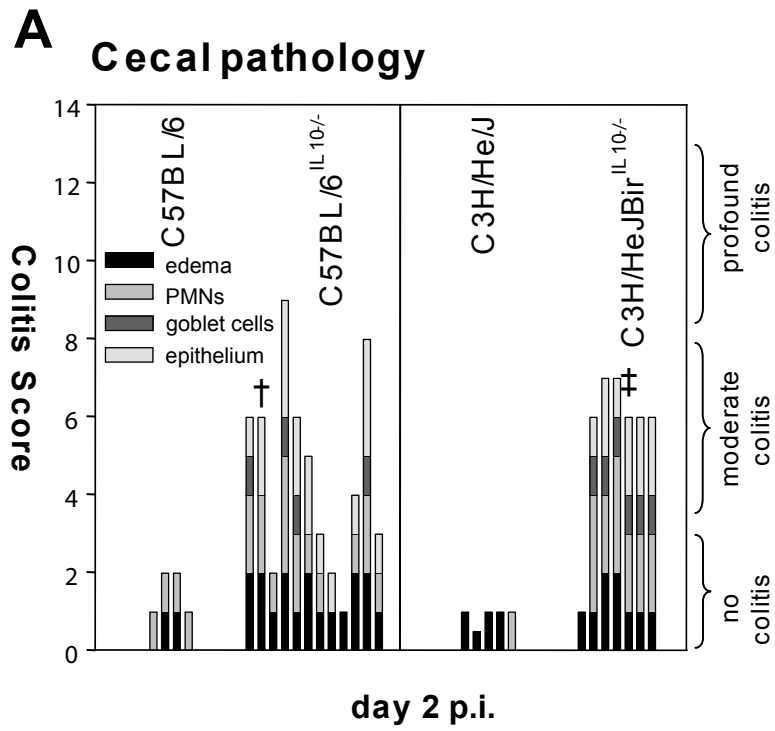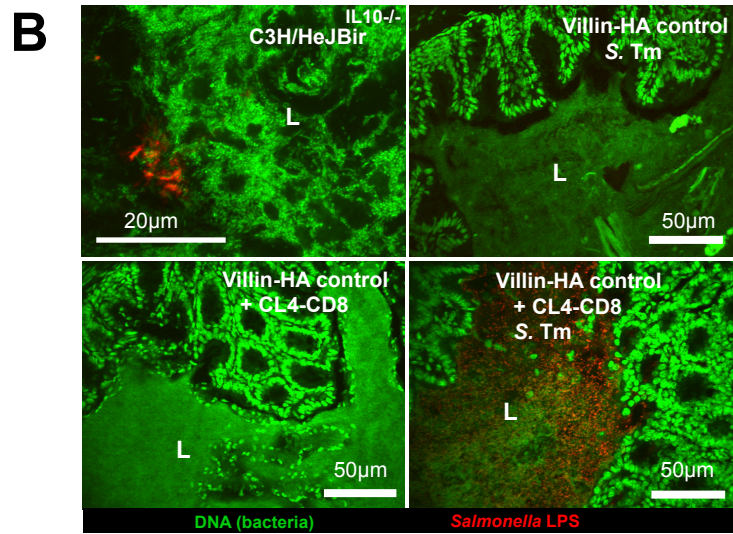

Supplement: pbio.0050244.sg004.pdf [file pbio.0050244.sg004.pdf]

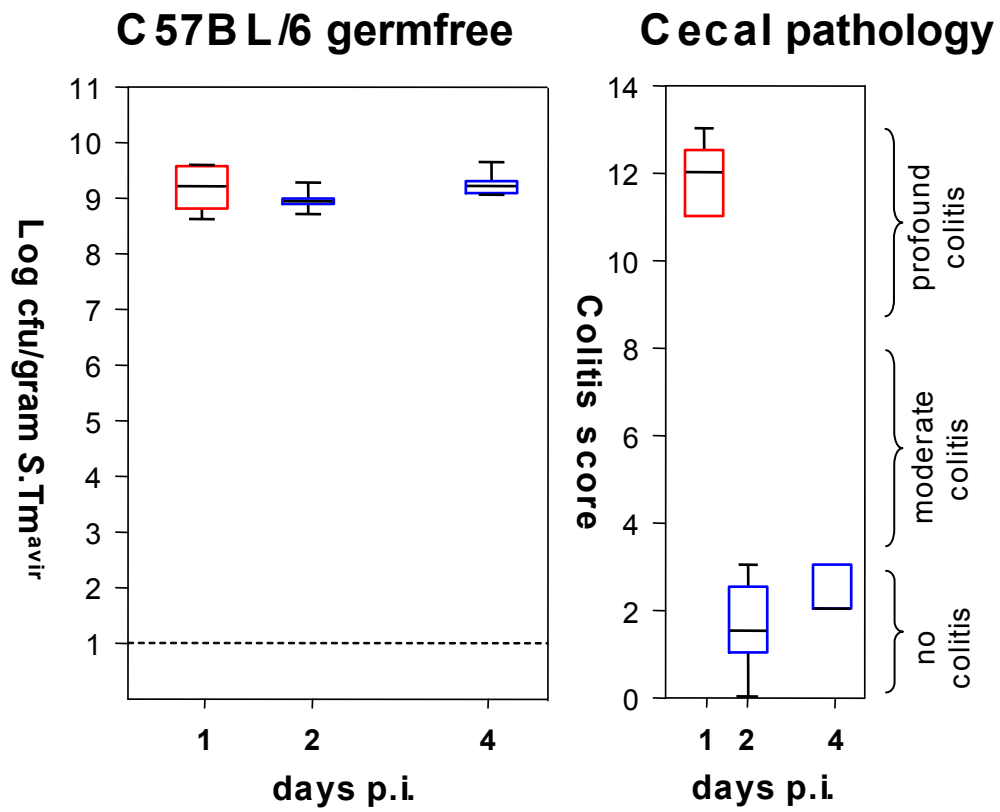

Supplement: pbio.0050244.sg005.pdf [file pbio.0050244.sg005.pdf]

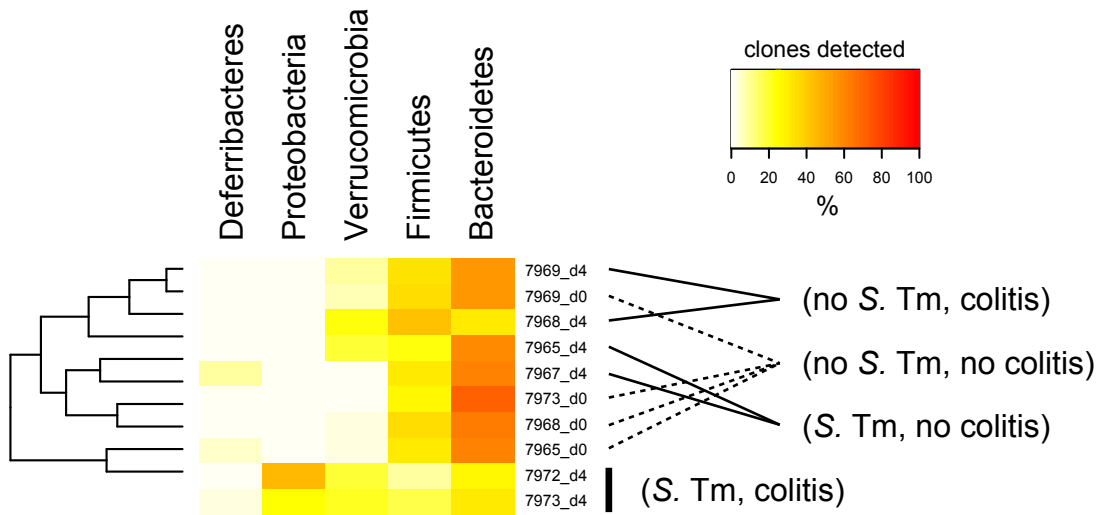

Supplement: pbio.0050244.sg006.pdf [file pbio.0050244.sg006.pdf]
